# Supplementary material for: A brand-new catalytic system: a Pd-based catalyst directly attached on the inner walls of the reactor which independently catalyzed the Heck reaction
Source: Royal Society of Chemistry journal article supplement (doi:10.1039/c5ra10340a), 2015-01-01
Supplement: c5ra10340a1.pdf [file c5ra10340a1.pdf]

## Supporting Information

### A Bran-new Catalytic System: Pd-based Catalyst Directly Attached on the Inner Walls Of The Reactor and Independently Catalyzed Heck Reaction

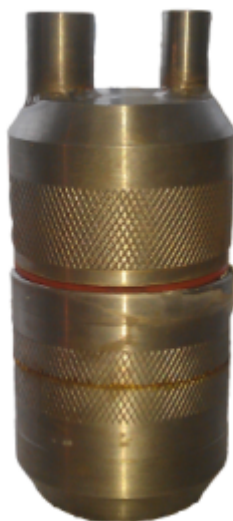

Figure S1. Digital photos of the reactor: the entire of reactor

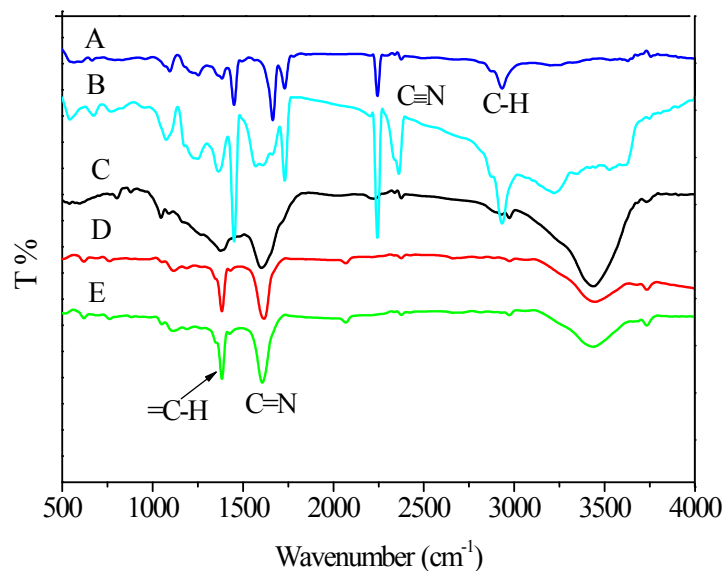

Figure S2. FTIR spectra of PAN/PdCl<sub>2</sub> fiber (A), Pd/PAN fibers after the hydrazine hydrate solution treatment (B), Pd/PANOF (C), together with Pd/LTCF-350 (D) and Pd/LTCF-450 (E).

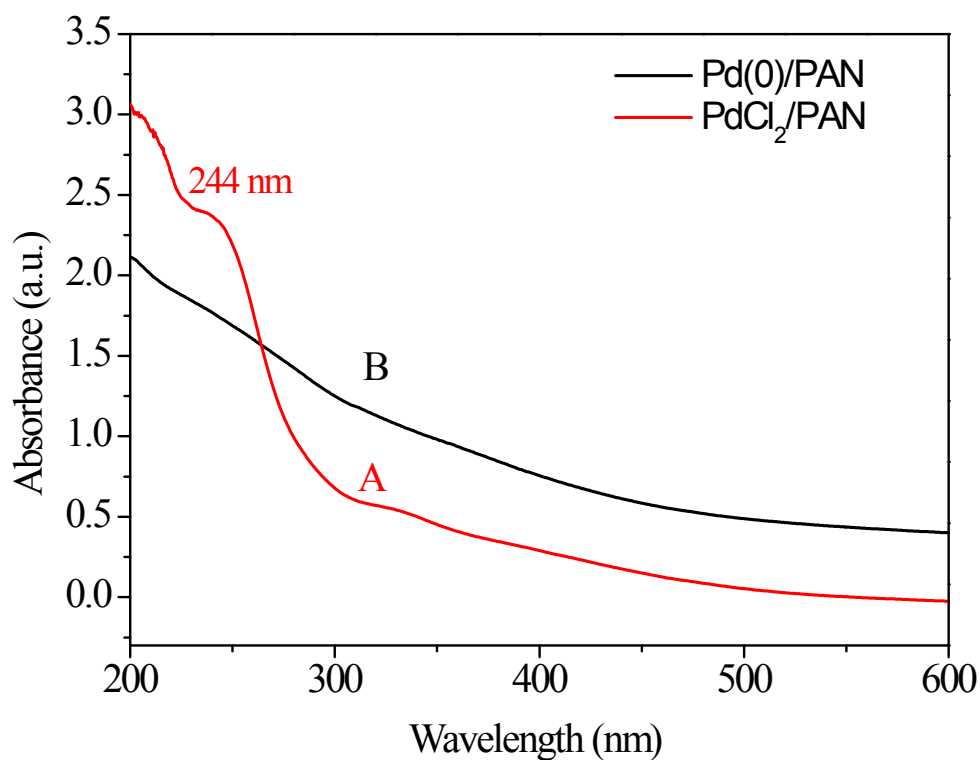

Figure S3. UV-vis spectra of PdCl<sub>2</sub>/PAN nanofiber films (A) and Pd /PAN nanofiber films (B).

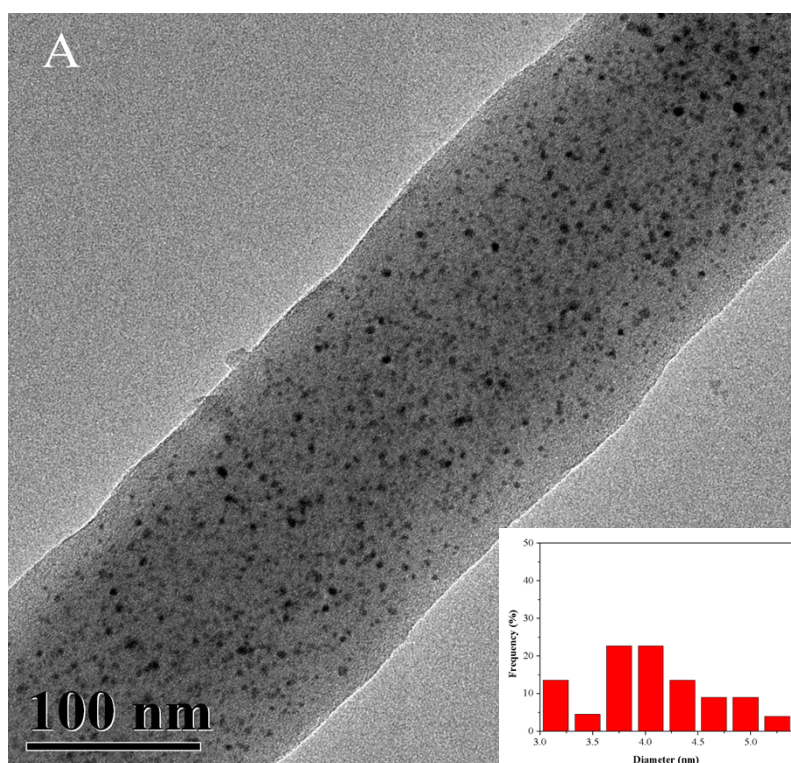

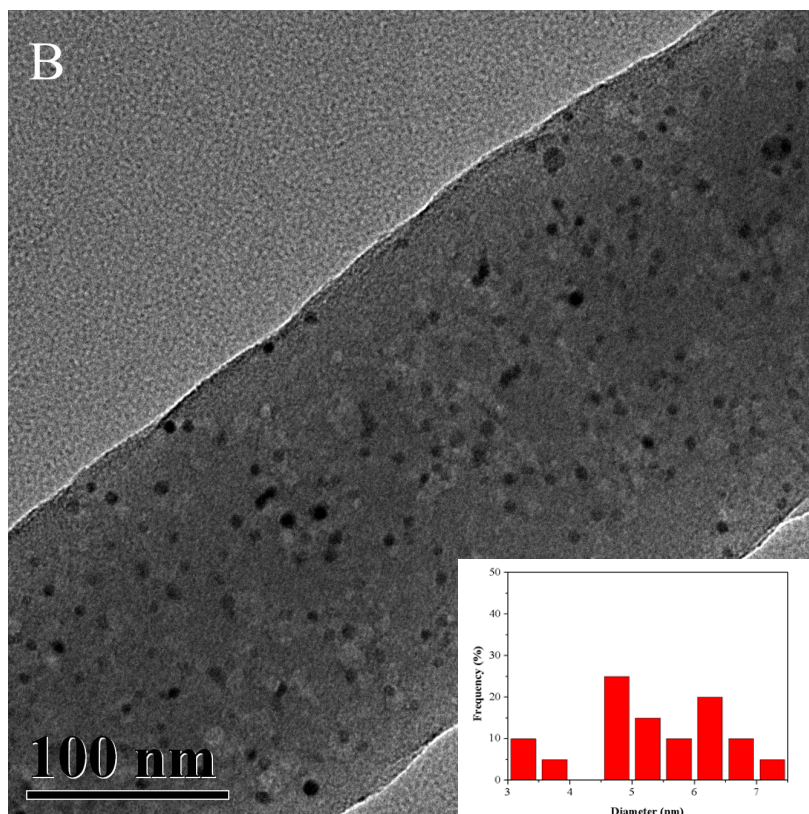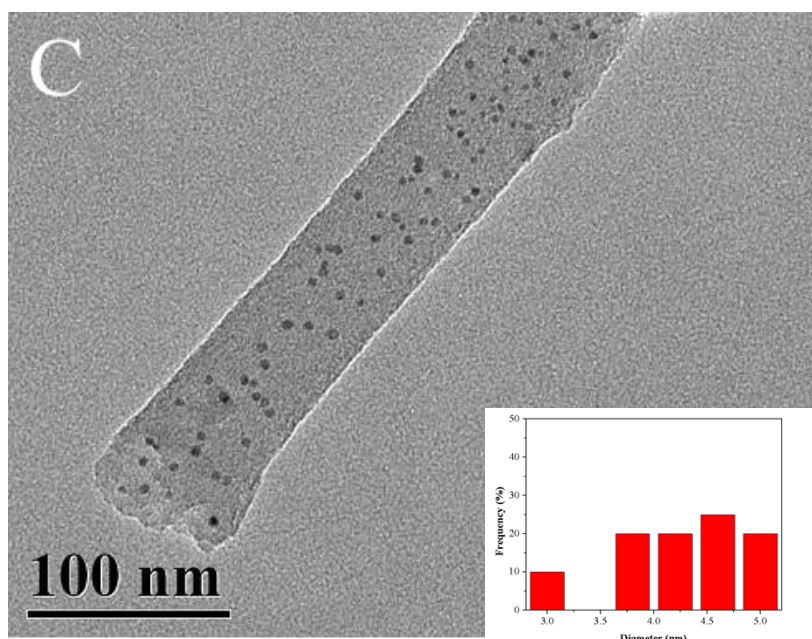

Figure S4. TEM images of the Pd/PANOF (A), Pd/LTCF-350 (B) and Pd/LTCF-450

(C) recovered from the fourth run of test reaction.

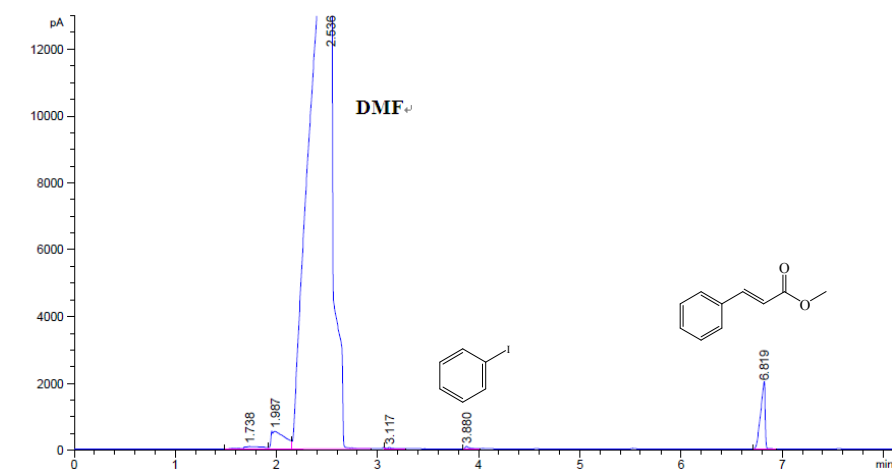

Figure S5. GC chromatogram of entry 1 reaction, Table 3.

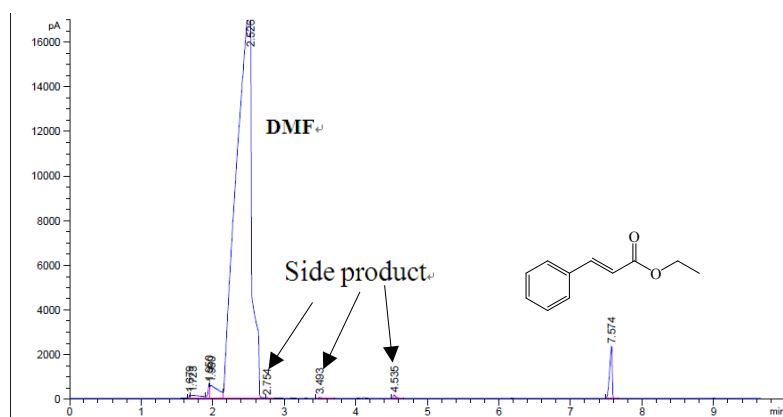

Figure S6. GC chromatogram of entry 2 reaction, Table 3.

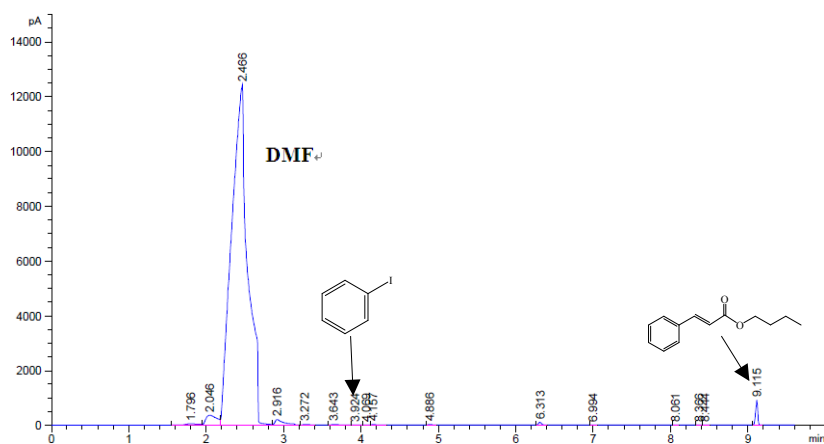

Figure S7. GC chromatogram of entry 3 reaction, Table 3.

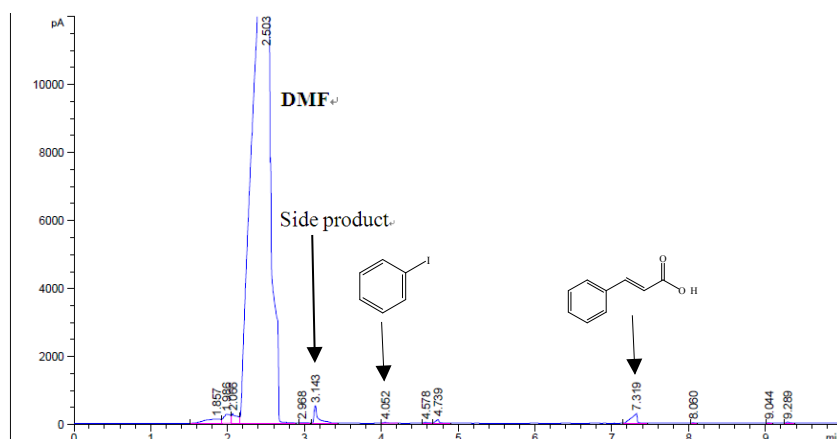

Figure S8. GC chromatogram of entry 4 reaction, Table 3.

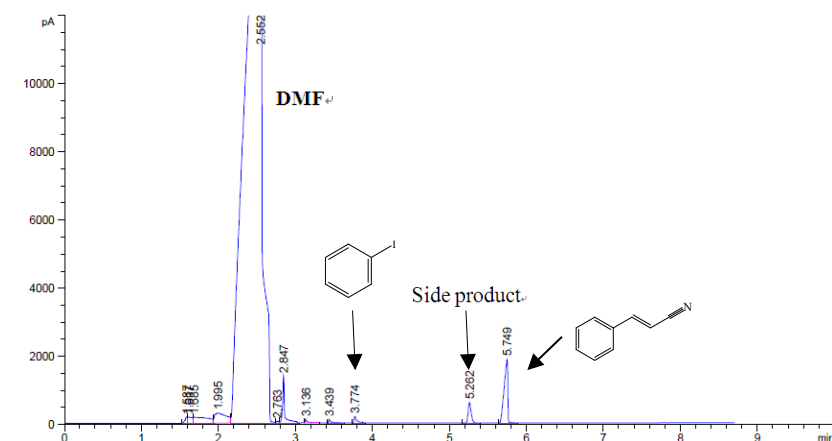

Figure S9. GC chromatogram of entry 5 reaction, Table 3

Table S1. Heck reaction with different bases.<sup>a</sup>

| Entry | Base                            | Conversion (%) | Selective (%) |
|-------|---------------------------------|----------------|---------------|
| 1     | K <sub>2</sub> CO <sub>3</sub>  | 8.5            | 22.5          |
| 2     | Cs <sub>2</sub> CO <sub>3</sub> | 11.3           | 82.68         |
| 3     | KOH                             | 28.3           | 10.9          |
| 4     | TEA                             | 99.34          | 69.86         |

<sup>a</sup> Reaction conditions: iodobenzene (1 mmol); n-butyl acrylate (1.5 mmol); Base (3mmol); catalyst: Pd/ LTCF-450 in 10 ml DMF; temperature: 100 °C; reaction time: 24 h.

<sup>b</sup> Determined from the GC analysis.
